# Supplementary material for: Influence of mercaptopropionic-acid-capped CdTe quantum dots on the human chorionic gonadotropin structure and activity alterations
Source: Royal Society of Chemistry journal article supplement (doi:10.1039/c6ra12199c), 2016-01-01
Supplement: c6ra12199c1.pdf [file c6ra12199c1.pdf]

## Supplementary information

### **Influence of the Mercaptopropionic-acid-Capped CdTe Quantum Dots on the Human Chorionic Gonadotropin Structure and Activity Alterations<sup>†</sup>**

Minglu Hao, Rutao Liu\*

Shandong Key Laboratory of Water Pollution Control and Resource Reuse, School of Environmental Science and Engineering, Shandong University, China–America CRC for Environment & Health, Shandong Province, 27# Shanda South Road, Jinan 250100, P.R. China

\*All correspondence should be addressed to:

Rutao Liu

School of Environmental Science and Engineering,

Shandong University, Jinan 250100 P.R.China

Phone/Fax: 86-531-88365489

Email: [rutaoliu@sdu.edu.cn](mailto:rutaoliu@sdu.edu.cn) (Liu RT)

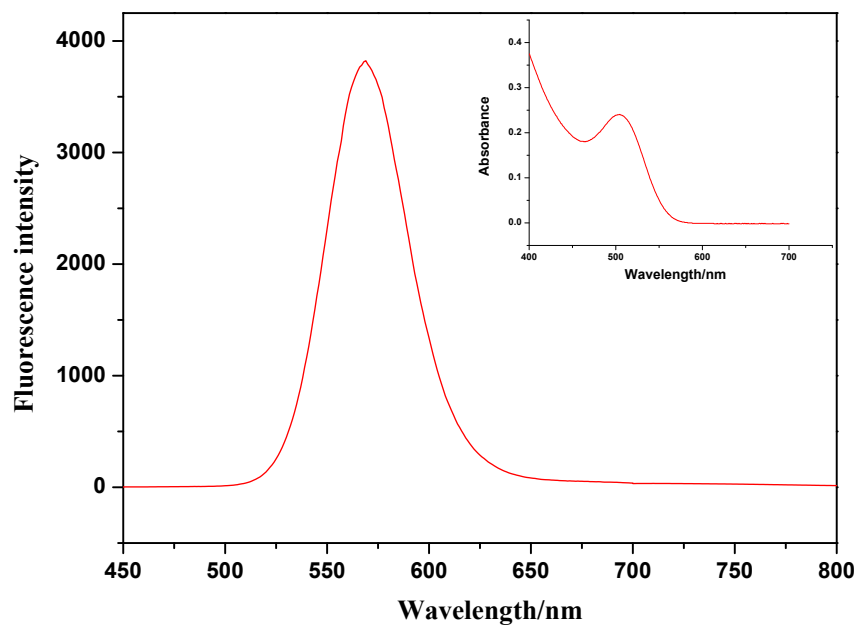

**Fig. S1** UV-vis absorption spectra and fluorescence emission spectra of MPA-Caped CdTe QDs.

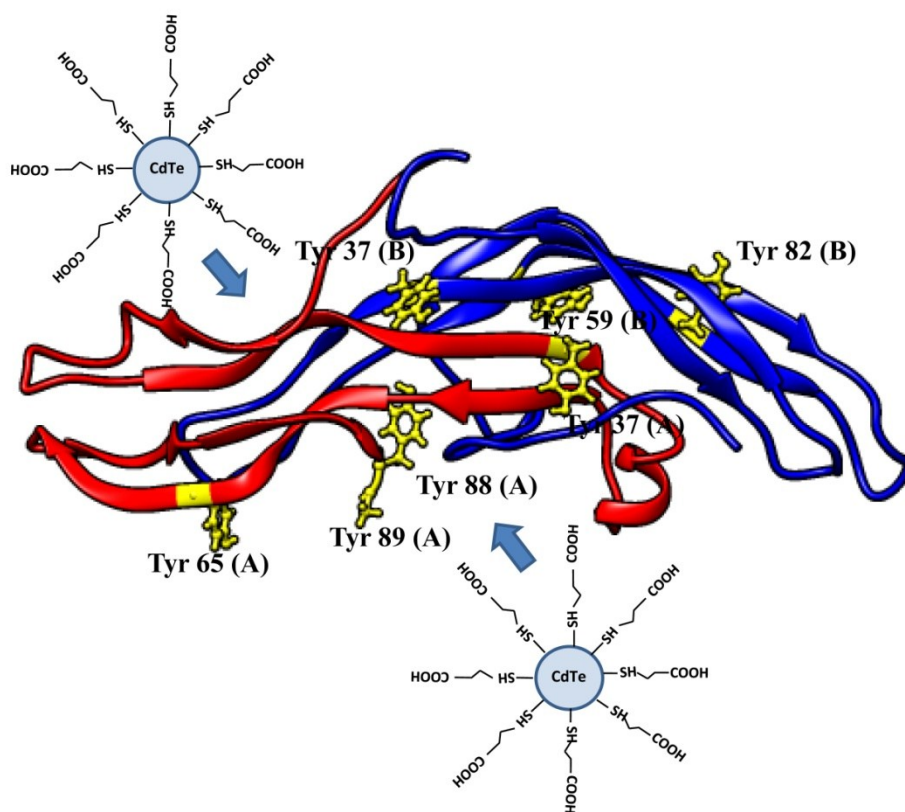

**Fig. S2** The schematic representation of the interaction mechanism of MPA-CdTe QDs to hCG.
